# Supplementary material for: Impact of Acute Kidney Injury on Outcomes of Hospitalizations for Heat Stroke in the United States
Source: PubMed Central journal article supplement (PMC7563434; doi:10.3390/diseases8030028), 2020-07-15
Supplement: diseases-08-00028-s001.pdf [file diseases-08-00028-s001.pdf]

**Table S1.** ICD-9 code for patient characteristics, treatments, and outcomes.

|                                        |                                                                                                                                                                                                                                                                                        |
|----------------------------------------|----------------------------------------------------------------------------------------------------------------------------------------------------------------------------------------------------------------------------------------------------------------------------------------|
| <b>Characteristics</b>                 |                                                                                                                                                                                                                                                                                        |
| Smoking                                | 305.1, 649.0, 989.84                                                                                                                                                                                                                                                                   |
| Alcohol drinking                       | 291.0, 291.1, 291.2, 291.3, 291.4, 291.5, 291.8, 291.81, 291.82, 291.89, 303.00-303.03, 303.90-303.93, 305.00-305.03                                                                                                                                                                   |
| Obesity                                | 278.0, 278.00, 278.01, 649.10– 649.14, 793.91, V85.30–V85.4, V85.54                                                                                                                                                                                                                    |
| Diabetes Mellitus                      | 249.00–249.31, 250.00–250.33, 648.00–648.04, 249.40–249.91, 250.40–250.93, 775.1                                                                                                                                                                                                       |
| Hypertension                           | 401.1, 401.9, 642.00–642.24, 401.0, 402.00– 405.99, 437.2, 642.10–624.24, 642.70–642.94                                                                                                                                                                                                |
| Dyslipidemia                           | 272.xx                                                                                                                                                                                                                                                                                 |
| Hypothyroidism                         | 243.xx, 244.xx                                                                                                                                                                                                                                                                         |
| Congestive heart failure               | 428.xx                                                                                                                                                                                                                                                                                 |
| Chronic kidney disease                 | 585.1, 585.2, 585.3, 585.3, 585.4, 585.5, 585.6, 585.9                                                                                                                                                                                                                                 |
| Coronary artery disease                | 412.xx, 413.xx, 414.xx                                                                                                                                                                                                                                                                 |
| Atrial flutter/fibrillation            | 427.31, 427.32                                                                                                                                                                                                                                                                         |
| Complication                           |                                                                                                                                                                                                                                                                                        |
| Rhabdomyolysis                         | 728.88                                                                                                                                                                                                                                                                                 |
| Hyponatremia                           | 276.1                                                                                                                                                                                                                                                                                  |
| Hypernatremia                          | 276.0                                                                                                                                                                                                                                                                                  |
| Hypokalemia                            | 276.8                                                                                                                                                                                                                                                                                  |
| Hyperkalemia                           | 276.7                                                                                                                                                                                                                                                                                  |
| Hypocalcemia                           | 275.41                                                                                                                                                                                                                                                                                 |
| Hypercalcemia                          | 275.42                                                                                                                                                                                                                                                                                 |
| Hypo/hypermagnesemia                   | 275.2                                                                                                                                                                                                                                                                                  |
| Hypo/hyperphosphatemia                 | 275.3                                                                                                                                                                                                                                                                                  |
| Metabolic acidosis                     | 276.2                                                                                                                                                                                                                                                                                  |
| Metabolic alkalosis                    | 276.3                                                                                                                                                                                                                                                                                  |
| Gastrointestinal bleeding              | 578.xx                                                                                                                                                                                                                                                                                 |
| Sepsis                                 | 038.0, 038.10, 038.11, 038.19, 038.2, 038.3, 038.4, 038.40, 038.41, 038.42, 038.43, 038.44, 038.49, 038.8, 038.9, 790.7, 117.9, 112.5, 115.04, 115.14, 115.94, 112.81, 112.83, 003.1, 003.21, 036.2, 036.3, 036.0, 036.1, 036.42, 020.2, 022.3, 098.89, 098.84, 098.82, 995.92, 785.52 |
| Ventricular arrhythmia /Cardiac arrest | 427.1, 427.41, 427.5                                                                                                                                                                                                                                                                   |
| Acute myocardial infarction            | 410.xx                                                                                                                                                                                                                                                                                 |
| Treatment                              |                                                                                                                                                                                                                                                                                        |
| Invasive mechanical ventilation        | 96.70-96.73                                                                                                                                                                                                                                                                            |
| Blood component transfusion            | 99.00-99.07                                                                                                                                                                                                                                                                            |
| Renal replacement therapy              | 39.95                                                                                                                                                                                                                                                                                  |

| <b>Organ Failure</b> | <b>Description</b>                                                                                                                                                       | <b>ICD-9CM</b>            |
|----------------------|--------------------------------------------------------------------------------------------------------------------------------------------------------------------------|---------------------------|
|                      | Acute respiratory failure                                                                                                                                                | 518.81                    |
|                      | Other pulmonary insufficiency, not elsewhere classified. Includes - acute respiratory distress, acute respiratory insufficiency, adult respiratory distress syndrome NEC | 518.82                    |
| Respiratory          | Acute respiratory distress syndrome after shock or trauma                                                                                                                | 518.85                    |
|                      | Respiratory distress NOS                                                                                                                                                 | 786.09                    |
|                      | Respiratory arrest                                                                                                                                                       | 799.1                     |
|                      | Ventilator management                                                                                                                                                    | 96.7, 96.70, 96.71, 96.72 |

|                |                                                         |                                                                         |
|----------------|---------------------------------------------------------|-------------------------------------------------------------------------|
|                | Shock without mention of trauma                         | 785.5                                                                   |
|                | Shock unspecified                                       | 785.50                                                                  |
| Cardiovascular | Other shock without trauma (includes hypovolemic Shock) | 785.59                                                                  |
|                | Cardiogenic shock                                       | 785.51                                                                  |
|                | Septic shock                                            | 785.52                                                                  |
|                | Hypotension NOS                                         | 458.8, 458.9, 796.3                                                     |
| Renal          | Acute kidney injury                                     | 584, 584.5, 584.6, 584.7, 584.8, 584.9                                  |
|                | Acute hepatic failure or necrosis                       | 570                                                                     |
| Hepatic        | Hepatic encephalopathy                                  | 572.2                                                                   |
|                | Hepatitis unspecified                                   | 573.3                                                                   |
|                | Hepatic infarction                                      | 573.4                                                                   |
|                | Defibrination syndrome                                  | 286.6                                                                   |
| Hematologic    | Acquired coagulation factor deficiency                  | 286.7                                                                   |
|                | Other coagulation defect                                | 286.9                                                                   |
|                | Thrombocytopenia - secondary or unspecified             | 287.49, 287.5                                                           |
| Metabolic      | Acidosis – metabolic or lactic                          | 276.2                                                                   |
|                | Transient organic psychotic conditions                  | 293, 293.0, 293.1, 293.8, 293.81, 293.82, 293.83, 293.84, 293.89, 293.9 |
|                | Anoxic brain injury                                     | 348.1                                                                   |
| Neurologic     | Acute encephalopathy                                    | 348.3, 348.30, 348.31, 348.39                                           |
|                | Coma                                                    | 780.01                                                                  |
|                | Altered consciousness - unspecified                     | 780.09                                                                  |
|                | Electroencephalogram                                    | 89.14                                                                   |
|                | Convulsion                                              | 780.39                                                                  |
